# Supplementary material for: MicroRNA as Possible Mediators of the Synergistic Effect of Celecoxib and Glucosamine Sulfate in Human Osteoarthritic Chondrocyte Exposed to IL-1β
Source: Preprints.org preprint supplement (doi:10.20944/preprints202309.0677.v1), 2023-09-12
Supplement: Supplementary file 1 [file supplementary]

| **Table S1. List of primers for quantitative real time PCR.** | |
| --- | --- |
| **Target Genes** | **Cat. No. (Qiagen)** |
| *BCL2* | QT00000721 |
| *NRF2* | QT00027384 |
| *miR-34a* | MS00003318 |
| *miR-140* | MS00003319 |
| *miR-146a* | MS00003535 |
| *miR-155* | MS00008778 |
| *miR-181a* | MS00006692 |
| *miR-210* | MS00006782 |
| *miR-375* | MS00003741 |
| *miR-let7e* | MS00031801 |
| *ACTB* | QT00095431 |
| *SNORD-25* | MS00014007 |

Abbreviations: *BCL2* = B-cell lymphoma 2, *NRF2* = nuclear factor erythroid 2 like 2, *miRNA =* microRNA, *ACTB* = Actin Beta, *SNORD-25* = Small Nucleolar RNA, C/D Box 25.
